# Supplementary material for: Determination of Pb2+ in natural water with a polymer electrode coupled with a flow analysis device
Source: Royal Society of Chemistry journal article supplement (doi:10.1039/d4ew00900b), 2024-12-09
Supplement: d4ew00900b1.pdf [file d4ew00900b1.pdf]

# Determination of $\text{Pb}^{2+}$ in natural water by polymer electrode coupled with a flow analysis device

Zhiwei Lai <sup>a, b, \*</sup>

<sup>a</sup> College of Petrochemical Engineering, Zhangzhou Institute of Technology, Zhangzhou 363000, China

<sup>b</sup> Collaborative Innovation Center of Fine Chemicals in Fujian Province, Zhangzhou Institute of Technology, Zhangzhou 363000, China

## Supplementary Information

### 1 Preparation of the modified electrodes

The glass carbon electrode (GCE) was systematically polished using  $\alpha\text{-Al}_2\text{O}_3$  powder with particle sizes of 1.0, 0.3, and 0.05  $\mu\text{m}$ , followed by ultrasonic cleaning after each polishing step. A solution containing 4  $\text{mg mL}^{-1}$  pyrrole and 3  $\text{mg mL}^{-1}$  thiourea was prepared for electropolymerization via cyclic voltammetry (CV). The process involved a single scanning cycle with a starting potential of 0.0 V, a scan rate of 50  $\text{mV s}^{-1}$ , and a potential range from 0.0 to 1.0 V. Subsequently, the resulting poly(pyrrole thiourea) electrode was thoroughly washed with ultrapure water and allowed to dry at room temperature. The polypyrrole-modified electrode was prepared following identical procedures but without the addition of thiourea.

### Optimization of experimental conditions

The experimental parameters for detecting  $\text{Pb}^{2+}$  were optimized to obtain higher sensitivity. The pH value of buffer solution has obvious effect on the  $\text{Pb}^{2+}$  response current. As shown in Fig. S1b, in the pH range of 3.0 to 7.0, the current intensity increases with rising pH levels until reaching a pH of 5. A significant decrease in response current is observed when the pH exceeds 5, as  $\text{Pb}^{2+}$  readily forms hydrated ions at elevated pH values, which hinders detection. Consequently, a buffer solution with a pH of 5 was selected for further experiments.

The deposition potential and deposition time were also optimized during the experiment, with results presented in Fig. S1b. As the deposition potential gradually shifts from -0.7 V to -1.2 V, there

is a marked increase in the response current for  $\text{Pb}^{2+}$  ions. However, when the voltage falls below  $-0.8$  V, the response current becomes unstable; thus, a deposition potential of  $-0.8$  V was chosen for subsequent studies.

The effect of deposition time is illustrated in Fig. S1c, where it can be seen that the response current for  $\text{Pb}^{2+}$  exhibits an almost linear relationship with respect to deposition time. To facilitate rapid detection requirements, a deposition time of 240 seconds was selected. Additionally, we investigated how variations in flow rate within the electrochemical flow cell influence detection performance (Fig. S1d). Finally, we selected a flow rate of  $8 \text{ mL min}^{-1}$ .

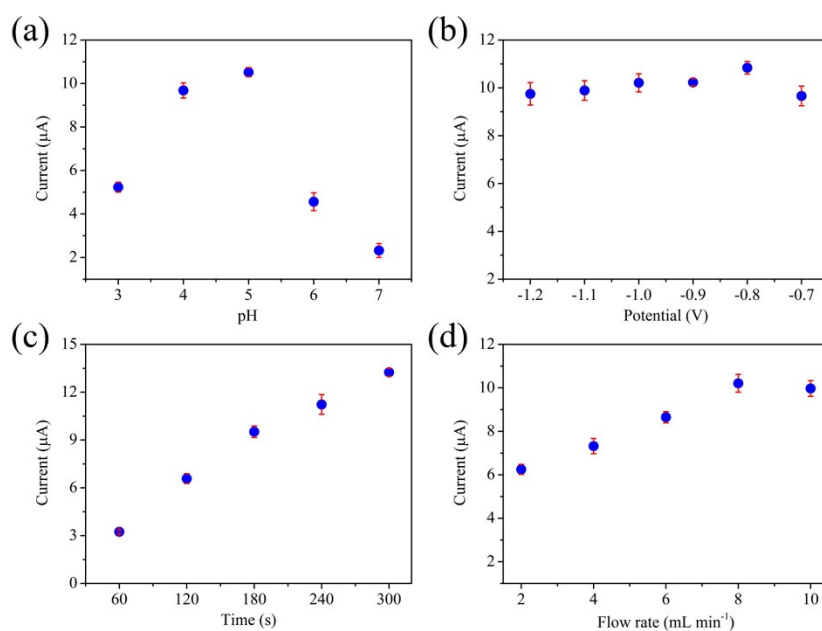

Fig. S1. Optimization the pH of buffer solution (a), the parameters of preconcentration potential (b), the preconcentration time (c), and the flow rate during preconcentration (d).
